# Supplementary material
Source: HighWire-hosted journal article supplement (http://ard.bmj.com/highwire/filestream/202696/field_highwire_adjunct_files/0/ARD_appendix_144741.docx)
Supplement: ARD_appendix_144741.docx [file ARD_appendix_144741.docx]

**Appendix A.** ICD-9 codes for infection

| Block | Code * | Diagnosis |
| --- | --- | --- |
| 1. Infections and parasitic diseases | 001-139 |  |
| 6. Diseases of the nervous system and sense organs | 320-324 | Meningitis, encephailitis, myelitis and encephalomyeleitis |
| 7. Diseases of the circulatory system | 421 | Acute and subacute endocarditis |
| 8. Diseases of the respiratory system | 460-466  480-488 | Acute respiratory infections  Pneumonia and influenza |
| 10. Disorders of the genitourinary tract | 590  595 | Infections of kidney  Cystitis |
| 12. Diseases of the skin and subcutaneous tissues | 680-4, 686 | Infections of the skin and subcutaneous tissues |
| 13. Diseases of the musculoskeletal system and connective tissue | 711.0  711.9  730 | Pyogenic arthritis  Unspecified infective arthritis  Osteomyelitis, periostitis and other infections involving bone |
